# Supplementary material
Source: MDPI journal article supplement (https://www.mdpi.com/1424-8247/15/4/392)
Supplement: s1 [file s1]

## Supplementary Materials

**Table S1.** Expression levels of transporter mRNA of selected genes in the liver of control and LPS-treated rats (24h after exposure to LPS).

| ABC transporters         |                              |                               |                          |                          |                          |                         |
|--------------------------|------------------------------|-------------------------------|--------------------------|--------------------------|--------------------------|-------------------------|
| Transporter (gene)       | P-gp ( <i>Abcb1a/Mdr1a</i> ) | P-gp ( <i>Abcb1b/Mdr1b</i> )  | Mrp2 ( <i>Abcc2</i> )    | Mrp3 ( <i>Abcc3</i> )    | Mrp4 ( <i>Abcc4</i> )    |                         |
| Healthy rats (n = 4)     | 2.9 ± 0.7                    | 21.6 ± 3.4                    | 129.6 ± 28.7             | 2.2 ± 0.9                | 2.7 ± 0.9                |                         |
| LPS-treated rats (n = 4) | 0.9 ± 0.4                    | 5.4 ± 2.4                     | 50.1 ± 20.9              | 0.8 ± 0.5                | 1.4 ± 0.6                |                         |
| SLC transporters         |                              |                               |                          |                          |                          |                         |
| Transporter (gene)       | Ntcp ( <i>Slc10a1</i> )      | Oat2 ( <i>Slc22a7</i> )       | Oatp1 ( <i>Slco1a1</i> ) | Oatp2 ( <i>Slco1a4</i> ) | Oatp4 ( <i>Slco1b2</i> ) | Oct1 ( <i>Slc22a1</i> ) |
| Healthy rats (n = 4)     | 248.0 ± 26.8                 | 17.0 ± 2.9                    | 74.4 ± 6.8               | 63.9 ± 8.9               | 193.5 ± 51.6             | 49.3 ± 8.6              |
| LPS-treated rats (n = 4) | 125.1 ± 17.6                 | 18.7 ± 9.0                    | 39.5 ± 9.8               | 10.9 ± 7.1               | 118.8 ± 53.8             | 22.9 ± 2.8              |
| Cytochromes              |                              |                               |                          |                          |                          |                         |
| Cytochrome (gene)        | Cyb2b1 ( <i>Cyp2b1</i> )     | Cyp3a1 ( <i>Cyp3a23-3a1</i> ) |                          |                          |                          |                         |
| Healthy rats (n = 4)     | 0.4 ± 0.2                    | 158.5 ± 26.7                  |                          |                          |                          |                         |
| LPS-treated rats (n = 4) | 0.2 ± 0.1                    | 41.0 ± 8.3                    |                          |                          |                          |                         |

Values are in arbitrary units. (Abcb: ATP-binding cassette sub-family B, Abcc: ATP-binding cassette sub-family C, Cyp: cytochrome-P450, LPS: lipopolysaccharide, Mdr: multidrug resistance protein, Mrp: multidrug-resistance associated protein, Ntcp: Na<sup>+</sup>-taurocholate cotransporting polypeptide, Oat: organic anion transporter, Oatp: organic anion transporting polypeptide, Oct: organic cation transporter, Slc: Solute carrier family)

**Table S2.** Area under the time-activity curves (AUC) of <sup>99m</sup>Tc-mebrofenin in the blood pool (imaged-derived), liver and intestine obtained in all the studied rat groups.

| Group                         | AUC <sub>blood</sub><br>(cps/MBq).min | AUC <sub>liver</sub><br>(cps/MBq).min | AUC <sub>intestine</sub><br>(cps/MBq).min |
|-------------------------------|---------------------------------------|---------------------------------------|-------------------------------------------|
| Healthy<br>(n = 5)            | 51 ± 14                               | 461 ± 109                             | 425 ± 85                                  |
| RIF 9 mg/kg<br>(n = 5)        | 105 ± 23                              | 559 ± 123                             | 237 ± 55                                  |
| RIF 40 mg/kg<br>(n = 5)       | 109 ± 12                              | 385 ± 28                              | 223 ± 54                                  |
| LPS<br>(n = 6)                | 129 ± 57                              | 814 ± 164                             | 277 ± 65                                  |
| LPS + RIF 9 mg/kg<br>(n = 6)  | 159 ± 46                              | 663 ± 188                             | 202 ± 37                                  |
| LPS + RIF 40 mg/kg<br>(n = 6) | 154 ± 70                              | 564 ± 43                              | 137 ± 60                                  |

Radioactivity is expressed in counts per second (cps) in each region of interest, normalized to the injected radioactivity amount in each animal (cps/MBq). Data are given as mean ± SD. (LPS: lipopolysaccharide, RIF: rifampicin). The data of healthy and RIF 40 mg/kg groups have already been presented in a previous study [29].

**Table S3.** Transfer rate constants obtained with the four-compartment model describing the hepatobiliary disposition of  $^{99m}\text{Tc}$ -mebrofenin in all the studied rat groups.

| Group                                | $k_1$ (min $^{-1}$ )            | $k_2$ (min $^{-1}$ )              | $k_3$ (min $^{-1}$ )            | $k_5$ (min $^{-1}$ )             |
|--------------------------------------|---------------------------------|-----------------------------------|---------------------------------|----------------------------------|
| <b>Healthy</b><br>(n = 5)            | 7.37 $\pm$ 1.62<br>(4.8 - 16)   | 0.15 $\pm$ 0.08<br>(7.2 - 30.8)   | 0.15 $\pm$ 0.08<br>(3.9 - 11.9) | 0.12 $\pm$ 0.03<br>(2.4 - 12.5)  |
| <b>RIF 9 mg/kg</b><br>(n = 5)        | 4.16 $\pm$ 1.43<br>(1.5 - 10.4) | 0.04 $\pm$ 0.02<br>(4.0 - 17.6)   | 0.02 $\pm$ 0.01<br>(1.6 - 5.2)  | 1.04 $\pm$ 0.62<br>(17.0 - 53.2) |
| <b>RIF 40 mg/kg</b><br>(n = 5)       | 0.89 $\pm$ 0.09<br>(3.6 - 7.6)  | 0.01 $\pm$ 0.01<br>(28.7 - 125.7) | 0.05 $\pm$ 0.02<br>(2.4 - 12.7) | 0.64 $\pm$ 0.88<br>(13.6 - 31.7) |
| <b>LPS</b><br>(n = 6)                | 8.72 $\pm$ 3.37<br>(1.6 - 9.9)  | 0.07 $\pm$ 0.03<br>(2.9 - 17.8)   | 0.02 $\pm$ 0.01<br>(1.9 - 35.3) | 0.30 $\pm$ 0.39<br>(9.8 - 49.3)  |
| <b>LPS + RIF 9 mg/kg</b><br>(n = 6)  | 5.14 $\pm$ 3.05<br>(2.2 - 13.1) | 0.08 $\pm$ 0.04<br>(4.0 - 19.4)   | 0.05 $\pm$ 0.02<br>(2.0 - 14.5) | 0.08 $\pm$ 0.09<br>(6.6 - 19.4)  |
| <b>LPS + RIF 40 mg/kg</b><br>(n = 6) | 1.9 $\pm$ 0.78<br>(1.0 - 6.4)   | 0.03 $\pm$ 0.03<br>(7.2 - 39.9)   | 0.03 $\pm$ 0.01<br>(3.0 - 61.4) | 0.10 $\pm$ 0.10<br>(14.7 - 69.9) |

Values are given as mean  $\pm$  SD. Values in parentheses express percent coefficient of variation (%CV) of the parameters (parameter precision).  $k_1$  and  $k_2$  are the parameters describing the transfer of radiotracer between blood and liver compartments,  $k_3$  describes the radiotracer transfer from liver tissue to the intrahepatic bile ducts and  $k_5$  describes the transfer of radiotracer from the intrahepatic bile ducts to the intestines (excreted bile). The data of healthy and RIF 40 mg/kg groups have already been presented in a previous study [29].

**Table S4.** Primer sequences used for qPCR assays.

| Gene (Protein)                          | Forward Primer (5'-3')         | Reverse Primer (5'-3')    |
|-----------------------------------------|--------------------------------|---------------------------|
| <i>Rn 18S</i>                           | CGCCGCTAGAGGTGAAATTC           | TTGGCAAATGCTTTCGCTC       |
| <i>Abcb1a/Mdr1a</i> (P-gp)              | CAGGTTGGCTGGACAGATTT           | CATGTCTCCAAAGACCAGCA      |
| <i>Abcb1b/Mdr1b</i> (P-gp)              | TTTGACTCGGGAGCAGAAGT           | AAGGTGATCCCAAAGACGTG      |
| <i>Abcc2</i> (Mrp2)                     | CGTCTCCTACGGTTTCCAGA           | ACTCAGAAAGGAAGCCGTGA      |
| <i>Abcc3</i> (Mrp3)                     | AGATCGCAGAGACAGGCAAT           | CCAGCATACAGGAGGCAGAT      |
| <i>Abcc4</i> (Mrp4)                     | TCAGATTGGTTATGAGGTCTG          | CCATTCTGGTTATTCTGCTG      |
| <i>Slc10a1</i> (Ntcp)                   | CAAGTCCAAAAGGCCACACT           | TGATGACAGAGAGGGCTGTG      |
| <i>Slc22a7</i> (Oat2)                   | CGCTCAGAATTCTCCTCCAC           | GCACACCAATGAAGAAGCAG      |
| <i>Slco1a1</i> (Oatp1)                  | AGGTCGAGAATGACGGAGAA           | ATTCCGAGGAAGGGAAGTGT      |
| <i>Slco1a4</i> (Oatp2)                  | TGGGATCTGTTTTCCACACA           | ATCTCGCTACCCCACCATTTCT    |
| <i>Slco1b2</i> (Oatp4)                  | GACATCACCCACTGGACCTT           | AGCATGTTCCCATCAAGAC       |
| <i>Slc22a1</i> (Oct1)                   | GGTTGCCAACAGGAGTCAGT           | AGACAGAGCTTACGGCCAAA      |
| <i>Cyp2b1</i> (Cyp2b1)                  | GGCTCACACCGGCTACCAA            | TGAAAACCTCTGAATCTCGTGGATA |
| <i>Cyp3a23-3a1</i><br>( <i>Cyp3a1</i> ) | GTAAATACTTGAGGCAAGAGAAAG<br>GC | TCGGGTTGTTGAGGGAATCA      |

(Abcb: ATP-binding cassette sub-family B, Abcc: ATP-binding cassette sub-family C, Cyp: cytochrome-P450, Mdr: multidrug resistance protein, Mrp: multidrug-resistance associated protein, Ntcp: Na $^{+}$ -taurocholate cotransporting polypeptide, Oat: organic anion transporter, Oatp: organic anion transporting polypeptide, Oct: organic cation transporter, Slc: Solute carrier family)

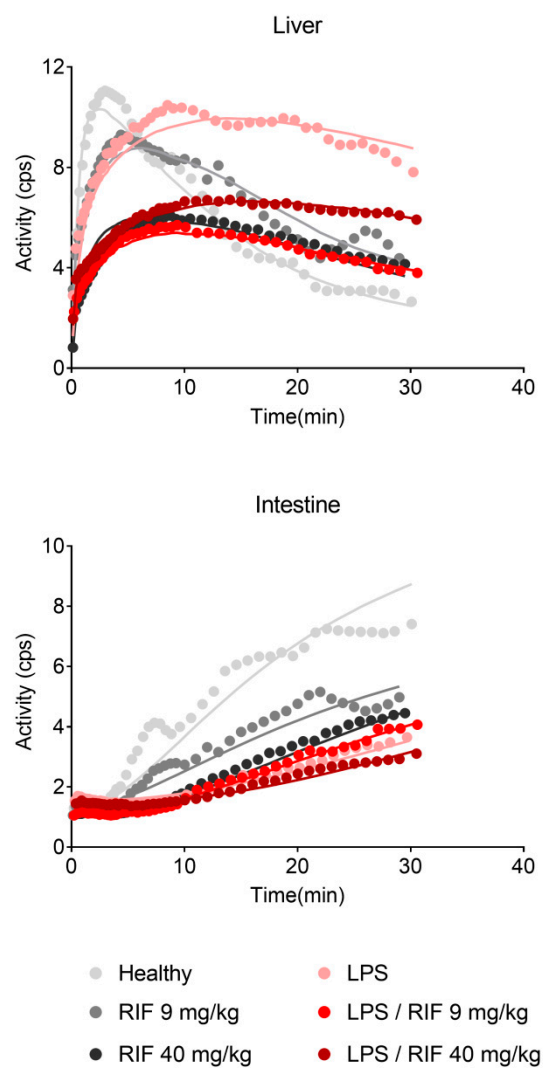

**Figure S1.** Time-activity curves of  $^{99m}\text{Tc}$ -mebrofenin in the liver and intestine for observed data (circles) and model fits (solid lines) in a representative subject of each studied rat group. (LPS: lipopolysaccharide, RIF: rifampicin). The data of healthy and RIF 40 mg/kg groups have already been presented in a previous study [29].
